# Supplementary material for: NO disproportionation over defective 1T′-MoS2 monolayers
Source: Royal Society of Chemistry journal article supplement (doi:10.1039/d0cp01800g), 2020-01-01
Supplement: d0cp01800g1.pdf [file d0cp01800g1.pdf]

## Supporting Information

### NO disproportionation over defective 1T'-MoS<sub>2</sub> monolayers

Yaoyao Linghu,<sup>a</sup> Chao Wu<sup>a\*</sup>

*E-mails: chaowu@xjtu.edu.cn*

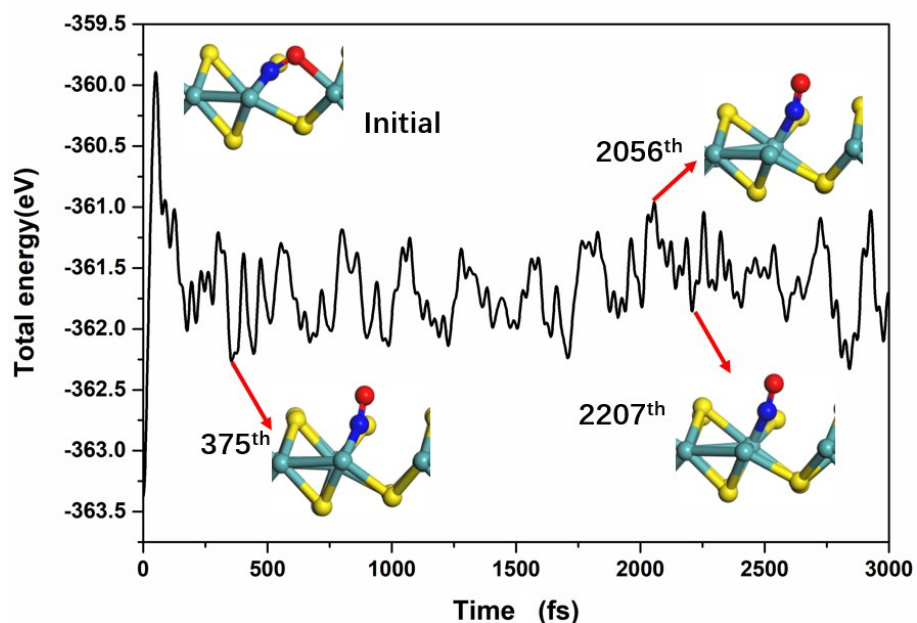

**Figure S1.** AIMD simulations of the defective 1T'-MoS<sub>2</sub> monolayer adsorbed with an side-on NO molecule. Insets: snapshots of the side views at the initial and 375<sup>th</sup>, 2056<sup>th</sup> and 2207<sup>th</sup> steps of the simulation at 300 K.

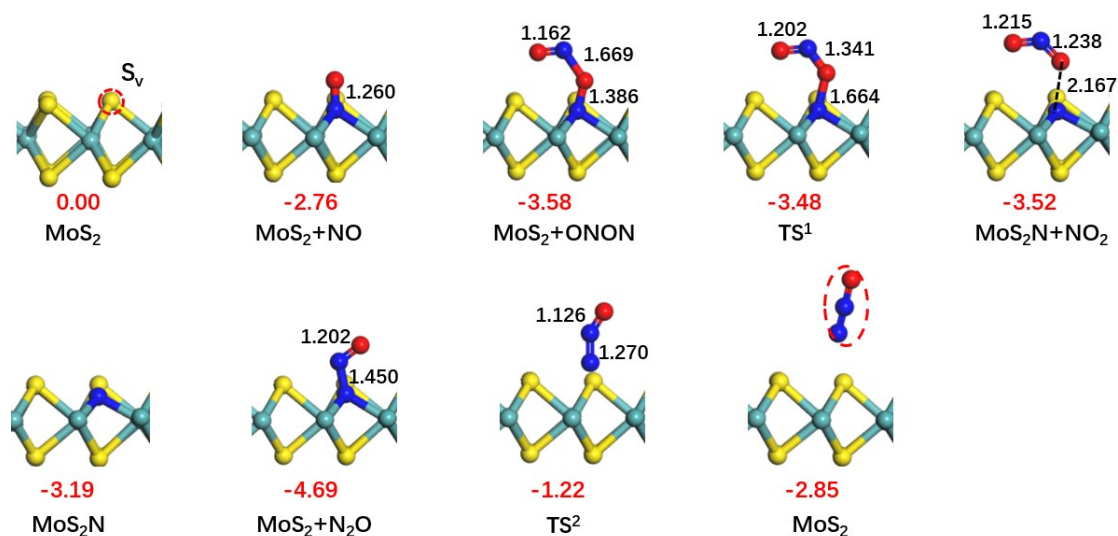

**Figure S2.** Key structures in the catalytic cycle of NO disproportionation on 2H-MoS<sub>2</sub> monolayers with S vacancies. The key bond length (Å) and relative energy (eV) are

labeled. Transition states are denoted as TS.

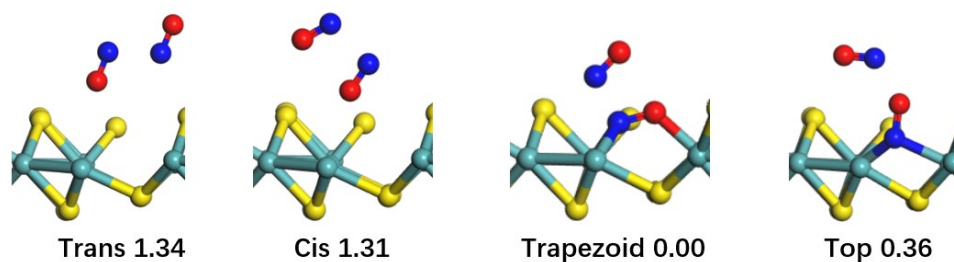

**Figure S3.** Possible adsorption configurations of two NO molecules adsorbed on defective 1T'-MoS<sub>2</sub> monolayer: trans-, cis- and trapezoid-2NO. The numbers labelled in figure represent the relative energies (eV) of the different configurations. The trans- and cis-(NO)<sub>2</sub> configurations are too high in energy to occur. Although the trapezoid-(NO)<sub>2</sub> configuration is energetically more stable, it is more difficult for N<sup>2</sup> to grab the O<sup>1</sup> atom to form NO<sub>2</sub>. In addition, the readily transformation from the side-on configuration of a single adsorbed NO to the N end-on configuration makes the existence of trapezoid-2NO unlikely.

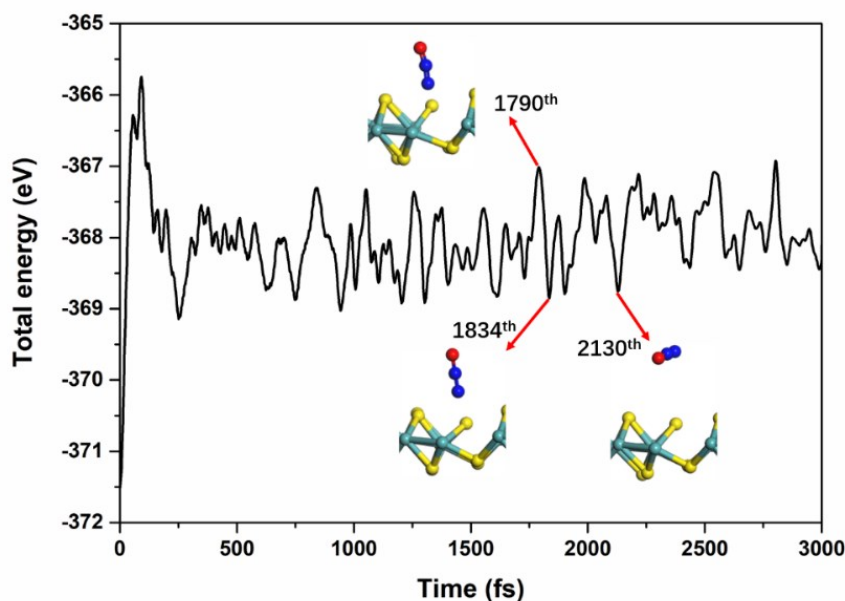

**Figure S4.** AIMD simulations of the adsorption of N<sub>2</sub>O on defective 1T'-MoS<sub>2</sub> monolayer. Insets: snapshots of the side views at the 1790<sup>th</sup>, 1834<sup>th</sup> and 2130<sup>th</sup> steps of the simulation at 500 K.

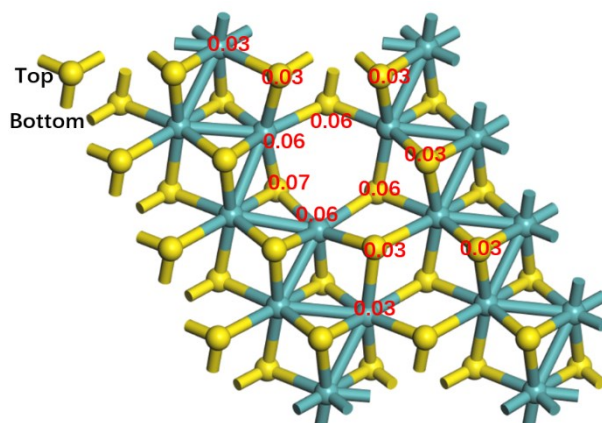

**Figure S5.** The electron change of the defective 1T'-MoS<sub>2</sub> monolayer. The red numbers represent the negative charge gained by the atoms.

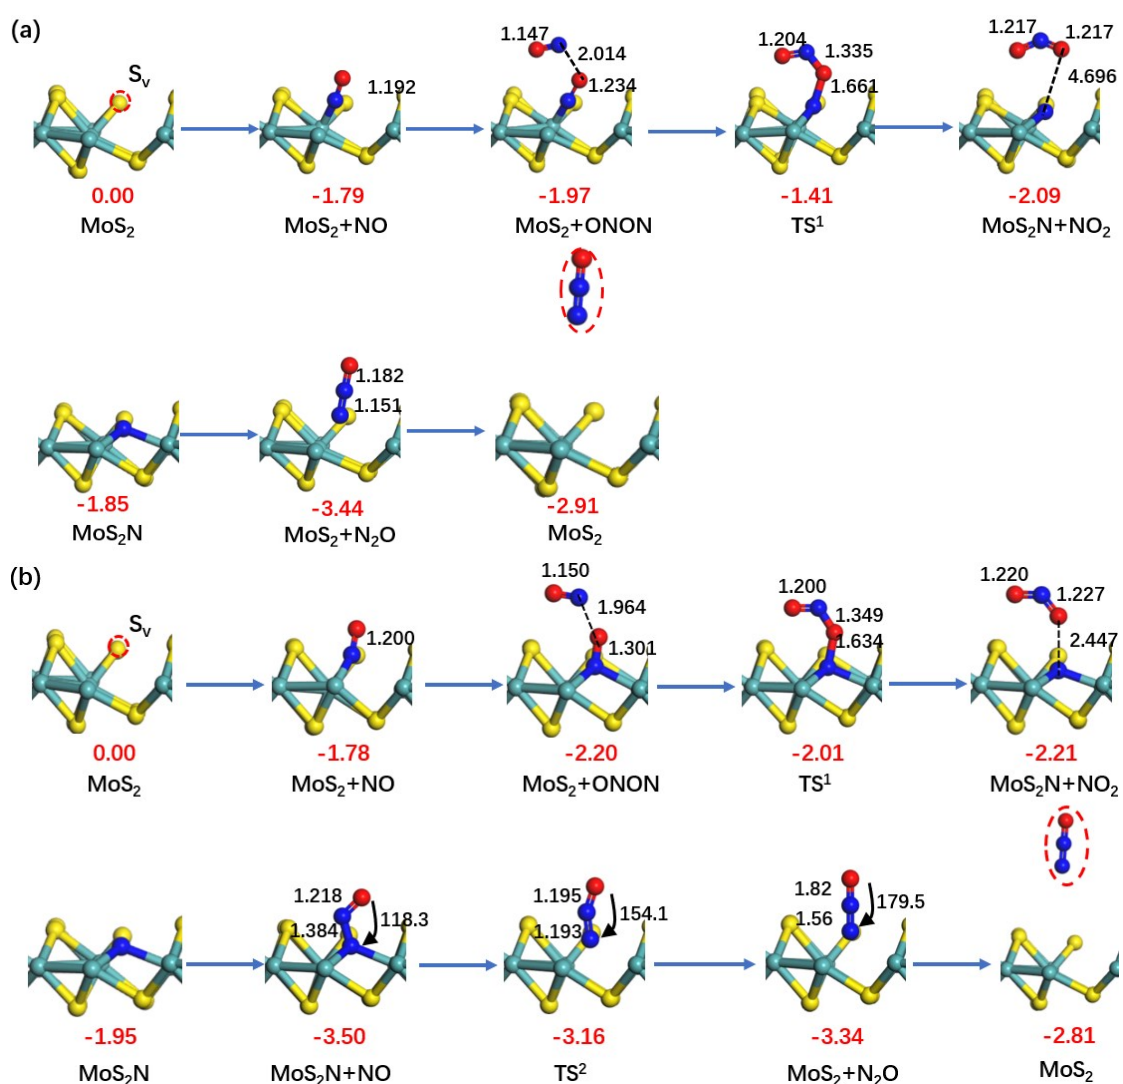

**Figure S6.** NO disproportionation pathways over defective 1T'-MoS<sub>2</sub> monolayers

under (a) 3% (tensile) strain and (b) -3% (compressive) strain.

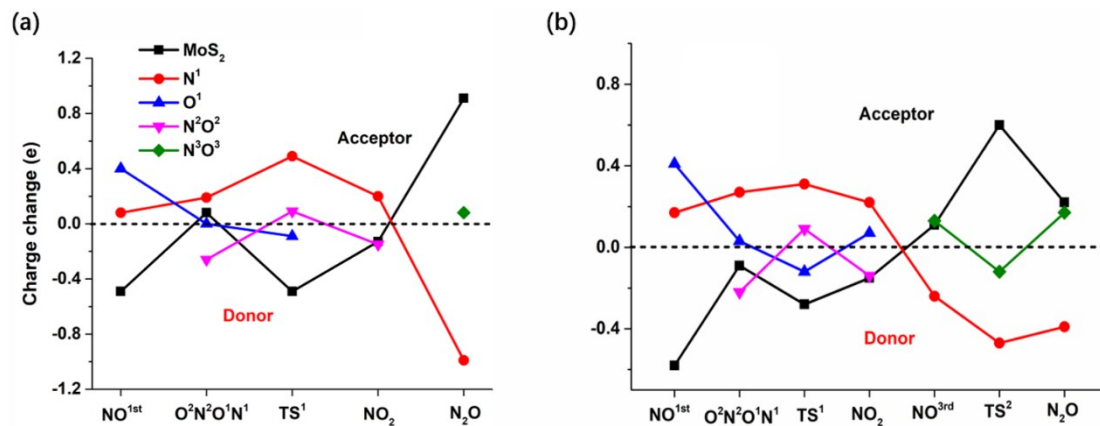

**Figure S7.** The change of negative charge in the defective 1T'-MoS<sub>2</sub> monolayer and the adsorbents during the NO disproportionation under (a) 3% (tensile) strain and (b) -3% (compressive) strain. NO<sup>1st</sup> and NO<sup>3rd</sup> represent the bindings of the first and third NO molecule, respectively. N<sup>1</sup> and O<sup>1</sup> atoms are from the first adsorbed NO molecule and N<sup>2</sup>O<sup>2</sup> (N<sup>3</sup>O<sup>3</sup>) denotes the second (third) adsorbed NO molecule. The positive (negative) value means gain (loss) electrons.

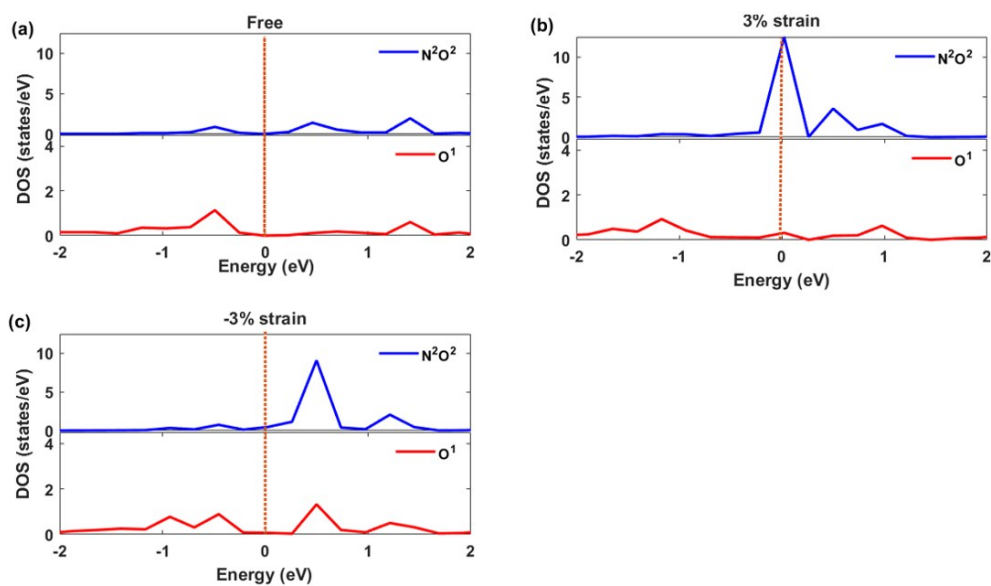

**Figure S8.** Local density of states (DOS) (projected on the adsorbed second  $\text{N}_2\text{O}_2$  molecule and  $\text{O}^1$  atom from first  $\text{NO}$  molecule) of defective  $1\text{T}'$ - $\text{MoS}_2$  monolayer with S vacancy adsorbed by two  $\text{NO}$  molecules. The Fermi level is indicated by the red dashed line.

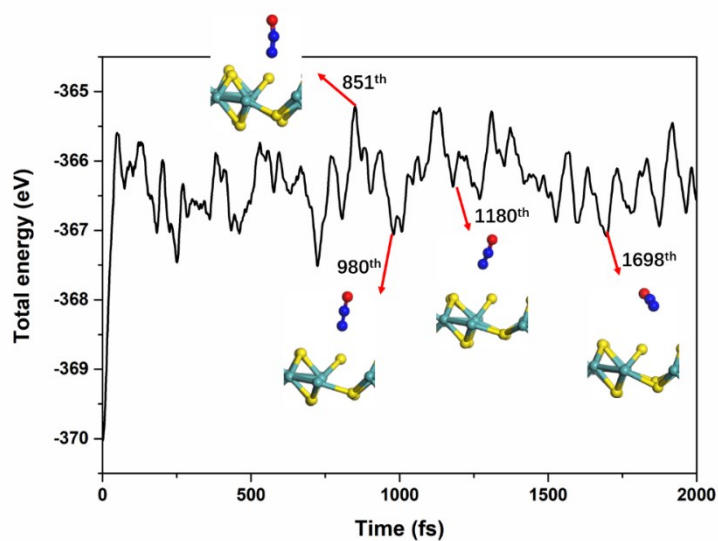

**Figure S9.** AIMD simulations of the adsorption of  $\text{N}_2\text{O}$  on 3% strained defective  $1\text{T}'$ - $\text{MoS}_2$  monolayer. Insets: snapshots of the side views at the 851<sup>th</sup>, 980<sup>th</sup>, 1180<sup>th</sup> and 1698<sup>th</sup> steps of the simulation at 500 K.

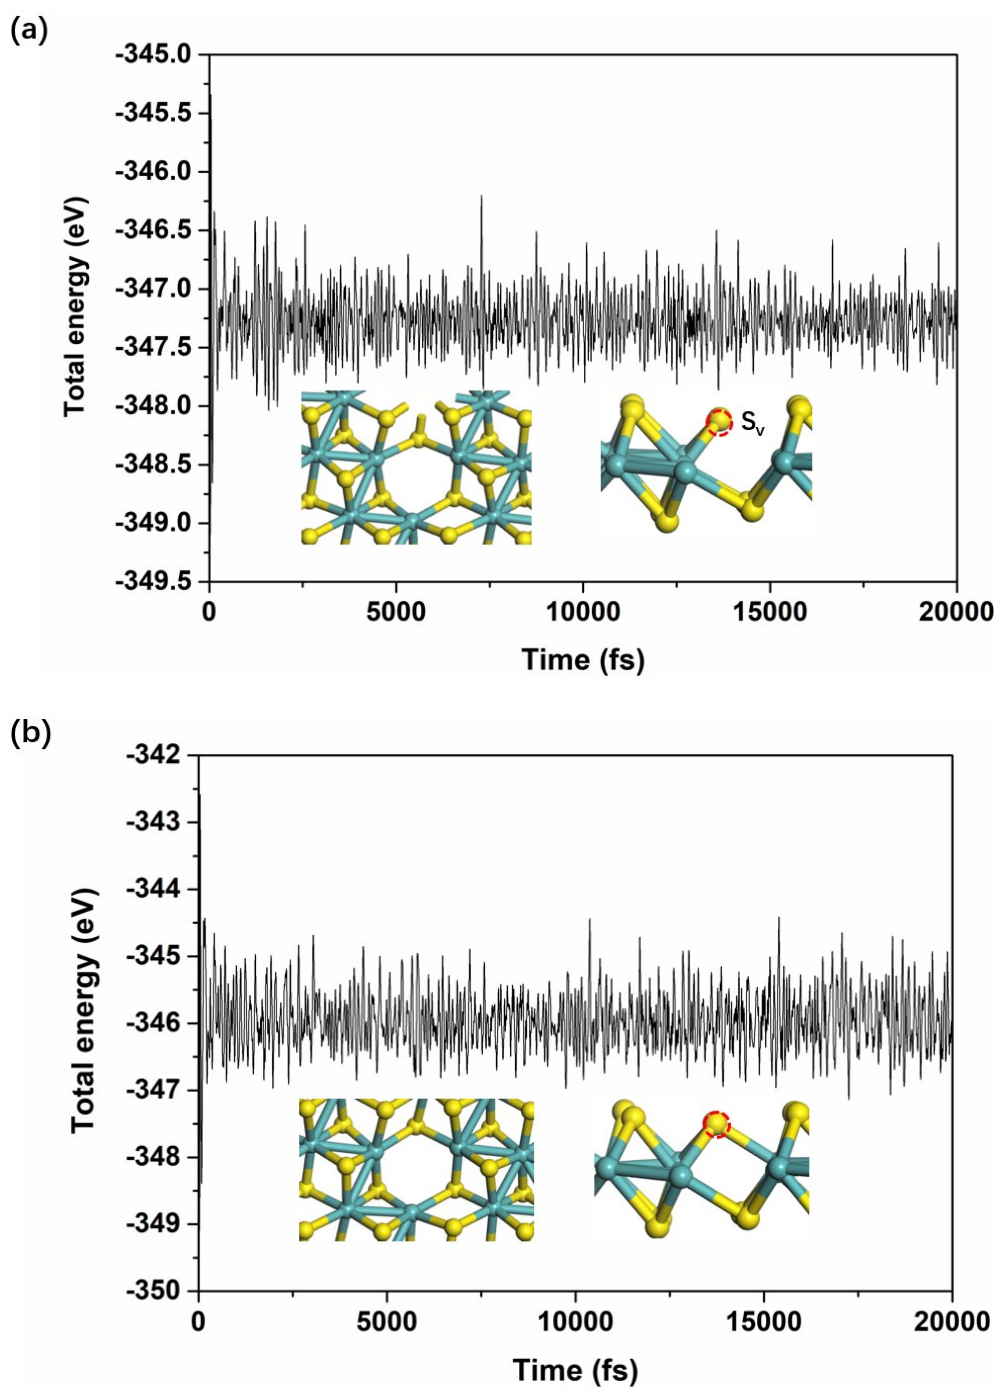

**Figure S10** AIMD simulations of -3% strained defective 1T'-MoS<sub>2</sub> monolayer at (a) 300K and (b) 500 K. Insets: snapshots of the top and side views at the end of the simulation, respectively.
